# Supplementary material for: Multiple MMCT properties of the diruthenium-based cyanido-bridged complex RuVI2-NC-RuII-CN-RuVI2
Source: Royal Society of Chemistry journal article supplement (doi:10.1039/d2dt00408a), 2022-01-01
Supplement: d2dt00408a1.pdf [file d2dt00408a1.pdf]

*Supplementary Information*

**The multiple MMCT properties of a diruthenium-based cyanido-bridged complex  $\text{Ru}_2^{\text{VI}}\text{-NC-Ru}^{\text{II}}\text{-CN-Ru}_2^{\text{VI}}$**

Shao-Dong Su,<sup>1</sup> Yue-Hong Wen,<sup>1</sup> Xin-Tao Wu,<sup>1</sup> and Tian-Lu Sheng\*<sup>1</sup>

<sup>1</sup>State Key Laboratory of Structural Chemistry, Fujian Institute of Research on the Structure of Matter, Chinese Academy of Sciences, Fuzhou 350002, People's Republic of China

## Table of Contents

### 1. Crystallographic Data

**Figure S1.** The structural diagram of complex  $1^{4+}[\text{PF}_6]_4$

**Table S1-S2:** Crystallographic data and a summary of the structural refinements for complexes  $1^{2+}[\text{PF}_6]_2$  and  $1^{4+}[\text{PF}_6]_4$

**Table S3:** Selected bond lengths and angles of complexes  $1^{2+}[\text{PF}_6]_2$  and  $1^{4+}[\text{PF}_6]_4$

### 2. Magnetic measurement

**Figure S2.** Variable temperature magnetic susceptibility measurement of complexes  $1^{2+}$  and  $1^{4+}$  in the range of 2-300K

### 3. IR spectra

**Figure S3.** IR spectra of complexes  $1^{2+}[\text{PF}_6]_2$  and  $1^{4+}[\text{PF}_6]_4$

### 4. Theoretical Calculations

**Figure S4.** Redistribution of electron densities for complex  $1^{2+}$  in the calculated MMCT transition band at  $16673\text{ cm}^{-1}$

**Figure S5.** Molecular orbital diagrams of orbital transition for MMCT at  $16673\text{ cm}^{-1}$  of  $1^{2+}$

**Table S4.** Gaussian peak fitting data of complex  $1^{4+}$

**Table S5.** Calculated MMCT absorption bands, energy, main orbital transition, oscillator strengths of complex  $1^{4+}$

## 1. Crystallographic data

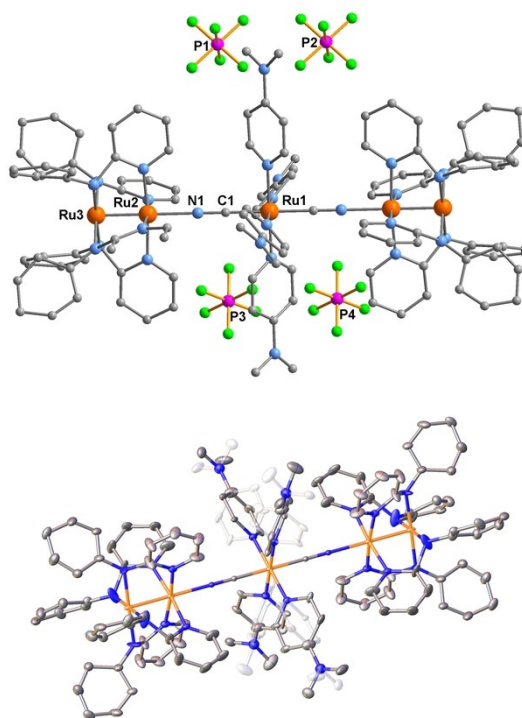

Figure S1. The structural diagram of complex  $1^+[\text{PF}_6]_4$  (top) and  $1^+$  with the disorder atoms displayed in shadow (bottom). [Orange(Ru), blue(N), grey(C), purple(P), green(F), H atoms have been omitted for clarity.]

Table S1. Crystallographic data and a summary of the structural refinements for complex  $1^{2+}[\text{PF}_6]_2$

| Complex                                   | $1^{2+}[\text{PF}_6]_2 \cdot 2.5 \text{ CH}_2\text{Cl}_2$ |
|-------------------------------------------|-----------------------------------------------------------|
| Empirical formula                         | C120.5 H117 F12 N26 P2 Ru5 Cl5                            |
| Color                                     | green                                                     |
| Crystal system                            | Triclinic                                                 |
| Space group                               | P -1                                                      |
| a (Å)                                     | 11.672(5)                                                 |
| b (Å)                                     | 11.727(5)                                                 |
| c (Å)                                     | 24.284(9)                                                 |
| alpha (deg.)                              | 81.355(14)                                                |
| beta (deg.)                               | 87.766(14)                                                |
| gamma (deg.)                              | 89.663(11)                                                |
| Volume(Å <sup>3</sup> )                   | 3284(2)                                                   |
| Z                                         | 1                                                         |
| Formula weight                            | 2901.93                                                   |
| Density(cal.)(Mg/m <sup>3</sup> )         | 1.468                                                     |
| Absorption coefficient(mm <sup>-1</sup> ) | 0.761                                                     |
| Temperature(K)                            | 100(2)                                                    |
| Theta range (deg.)                        | 2.388 to 24.998                                           |

|                                |                                  |
|--------------------------------|----------------------------------|
| <b>Reflections measured</b>    | <b>41879</b>                     |
| <b>Independent reflections</b> | <b>11457</b>                     |
| <b>Observed Reflection</b>     | <b>8648</b>                      |
| <b>Final R indices (obs.)</b>  | <b>R1 = 0.0829, wR2 = 0.1974</b> |
| <b>R indices (all)</b>         | <b>R1 = 0.1070, wR2 = 0.2160</b> |
| <b>Goodness-of-fit</b>         | <b>1.105</b>                     |

$$R_1 = \Sigma(|F_0| - |F_c|) / \Sigma|F_0|;$$

$$wR_2 = [\Sigma w(|F_0|^2 - |F_c|^2)^2 / \Sigma w|F_0|^2]^{1/2}$$

**Table S2. Crystallographic data and a summary of the structural refinements for complex 1<sup>4+</sup>[PF<sub>6</sub>]<sub>4</sub>**

| <b>Complex</b>                                 | <b>1<sup>4+</sup>[PF<sub>6</sub>]<sub>4</sub></b> |
|------------------------------------------------|---------------------------------------------------|
| <b>Empirical formula</b>                       | <b>C118 H112 F24 N26 P4 Ru5</b>                   |
| <b>Color</b>                                   | <b>purple</b>                                     |
| <b>Crystal system</b>                          | <b>Tetragonal</b>                                 |
| <b>Space group</b>                             | <b>I 4/m</b>                                      |
| <b>a (Å)</b>                                   | <b>14.352(2)</b>                                  |
| <b>b (Å)</b>                                   | <b>14.352(2)</b>                                  |
| <b>c (Å)</b>                                   | <b>33.260(7)</b>                                  |
| <b>alpha (deg.)</b>                            | <b>90</b>                                         |
| <b>beta (deg.)</b>                             | <b>90</b>                                         |
| <b>gamma (deg.)</b>                            | <b>90</b>                                         |
| <b>Volume(Å<sup>3</sup>)</b>                   | <b>6851(2)</b>                                    |
| <b>Z</b>                                       | <b>2</b>                                          |
| <b>Formula weight</b>                          | <b>2979.56</b>                                    |
| <b>Density(cal.)(Mg/m<sup>3</sup>)</b>         | <b>1.444</b>                                      |
| <b>Absorption coefficient(mm<sup>-1</sup>)</b> | <b>0.672</b>                                      |
| <b>Temperature(K)</b>                          | <b>100(2)</b>                                     |
| <b>Theta range (deg.)</b>                      | <b>1.499 to 25.364</b>                            |
| <b>Reflections measured</b>                    | <b>16352</b>                                      |
| <b>Independent reflections</b>                 | <b>3064</b>                                       |
| <b>Observed Reflection</b>                     | <b>2509</b>                                       |
| <b>Final R indices (obs.)</b>                  | <b>R1 = 0.1875, wR2 = 0.4048</b>                  |
| <b>R indices (all)</b>                         | <b>R1 = 0.2012, wR2 = 0.4112</b>                  |
| <b>Goodness-of-fit</b>                         | <b>1.049</b>                                      |

$$R_1 = \Sigma(|F_0| - |F_c|) / \Sigma|F_0|;$$

$$wR_2 = [\Sigma w(|F_0|^2 - |F_c|^2)^2 / \Sigma w|F_0|^2]^{1/2}$$

Table S3. Selected bond lengths (Å) and angles (deg.) of  $1^{2+}[\text{PF}_6]_2$  and  $1^{4+}[\text{PF}_6]_4$

|                             | $1^{2+}[\text{PF}_6]_2$ | $1^{4+}[\text{PF}_6]_4$ |
|-----------------------------|-------------------------|-------------------------|
| Ru(2)-Ru(3)                 | 2.2804(12)              | 2.253(5)                |
| Ru(1)-C(1)                  | 2.076(6)                | 1.979(18)               |
| Ru(2)-N(1)                  | 2.148(6)                | 2.14(2)                 |
| Ru-N <sub>ap</sub> -average | 2.081, 2.035            | 2.092, 2.016            |
| Ru-N <sub>DMAP</sub>        | 2.103                   | 2.10(2)                 |
| C(1)-Ru(1)-N(2)             | 89.8(2)                 | 92.1(7)                 |
| C(1)-Ru(1)-N(4)             | 90.4(3)                 | -                       |
| N(2)-Ru(1)-N(4)             | 90.1(2)                 | -                       |
| N(1)-C(1)-Ru(1)             | 179.0(6)                | 180.0                   |
| C(1)-N(1)-Ru(2)             | 179.5(6)                | 180.0                   |
| N(1)-Ru(2)-Ru(3)            | 179.91(17)              | 180.0                   |

## 2. Magnetic measurement

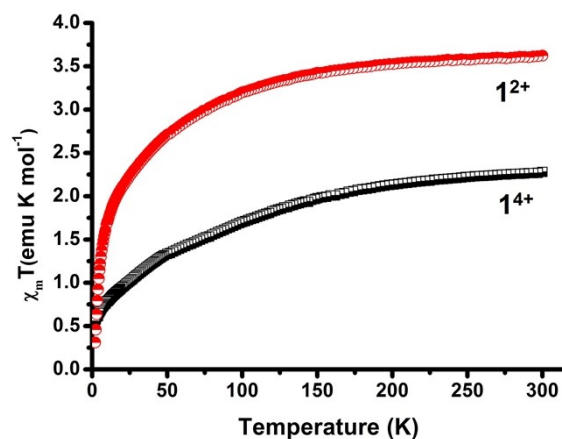

Figure S2. The variable temperature magnetic susceptibility measurement of complex  $1^{2+}$  (red  $\circ$ ) and  $1^{4+}$  (black  $\square$ ) in the range of 2-300K.

## 3. IR spectra

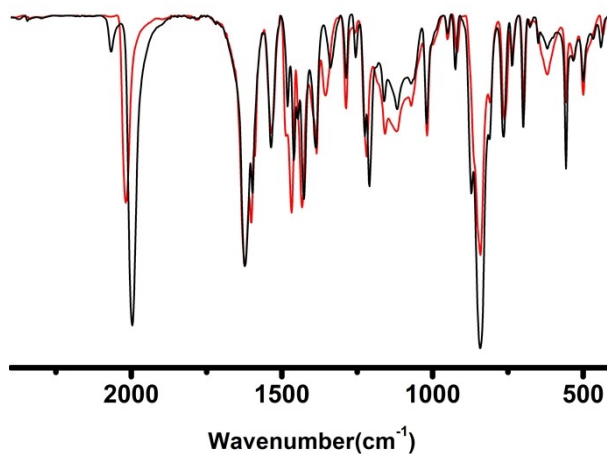

Figure S3. IR spectra of complexes  $1^{2+}[\text{PF}_6]_2$  (red line) and  $1^{4+}[\text{PF}_6]_4$  (black line).

#### 4. Theoretical calculation

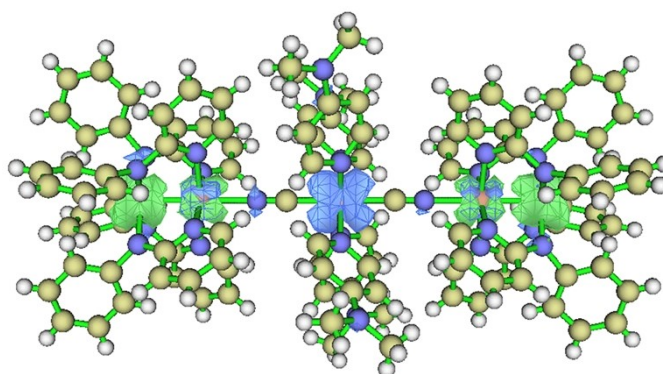

Figure S4. Redistribuition of electron densities for complex  $1^{2+}$  in the calculated MMCT transition band at  $16673 \text{ cm}^{-1}$  ( $f=0.0282$ ). The green and blue areas represent gain and loss of density.

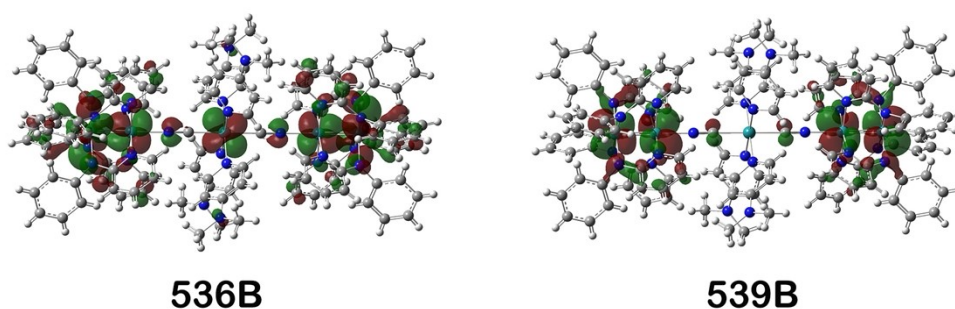

Figure S5. Molecular orbital diagrams of orbital transition HOMO-1 ( $536\beta$ )  $\rightarrow$  LUMO+1 ( $539\beta$ ) ( $0.51812$ ) for MMCT of  $1^{2+}$  at  $16673 \text{ cm}^{-1}$ .

Table S4. Gaussian peak fitting data of complex  $1^{4+}$ .

| $\nu_{\max}$ ( $\epsilon_{\max}$ , FWHM) [ $\text{cm}^{-1}(\text{M}^{-1}\text{cm}^{-1}, \text{cm}^{-1})$ ] |                      |                     |                     |
|------------------------------------------------------------------------------------------------------------|----------------------|---------------------|---------------------|
|                                                                                                            | MMCT-1               | MMCT-2              | MMCT-3              |
| $1^{4+}$                                                                                                   | 12715<br>(8848,2695) | 7730<br>(8764,2005) | 5996<br>(4719,2005) |

Table S5. Calculated MMCT absorption bands, energy, main orbital transition, oscillator strengths of complex  $1^{4+}$

|        | absorption band<br>( $\text{cm}^{-1}$ ) | Energy<br>(eV) | orbital transition                        | oscillator<br>strengths (f) |
|--------|-----------------------------------------|----------------|-------------------------------------------|-----------------------------|
| MMCT-1 | 13185                                   | 1.6348         | $536\beta \rightarrow 542\beta$ (0.79779) | 0.0207                      |
| MMCT-2 | 8111                                    | 1.0056         | $531\beta \rightarrow 542\beta$ (0.22701) | 0.0108                      |
| MMCT-3 | 6386                                    | 0.7918         | $537\beta \rightarrow 538\beta$ (0.90730) | 0.0136                      |
